# Supplementary material for: Impact of collegial midwifery assistance during second stage of labour on women’s experience: a follow-up from the Swedish Oneplus randomised controlled trial
Source: PubMed Central journal article supplement (PMC11284909; doi:10.1136/bmjopen-2023-077458), 2024-07-26
Supplement: bmjopen-14-7-s002.pdf [file bmjopen-14-7-s002.pdf]

**Supplementary material, table S1.** Background characteristics for responders and non-responders

| <b>Background characteristics</b>                 | <b>Responders<br/>(n=2221)</b> | <b>Non-responders<br/>(n=598)</b> | <b>p-value</b> |
|---------------------------------------------------|--------------------------------|-----------------------------------|----------------|
| Maternal age at birth (mean, SD)                  | 30.0 (4.28)                    | 27.9 (4.77)                       | <0.001         |
| BMI (mean, SD)                                    | 24.5 (4.50)                    | 24.9 (5.11)                       | 0.05           |
| Missing                                           | 107 (4.8)                      | 37 (6.2)                          |                |
| Marital status                                    |                                |                                   | <0.001         |
| Married or living with a partner                  | 2015 (90.7)                    | 484 (80.9)                        |                |
| Not living with a partner or other life situation | 110 (5.0)                      | 87 (14.5)                         |                |
| Missing                                           | 96 (4.3)                       | 27 (4.5)                          |                |
| Ethnicity                                         |                                |                                   |                |
| Nordic                                            | 1684 (75.8)                    | 241 (40.3)                        | <0.001         |
| European                                          | 215 (9.7)                      | 99 (16.6)                         | <0.001         |
| African                                           | 37 (1.7)                       | 47 (7.9)                          | <0.001         |
| Middle Eastern                                    | 122 (5.5)                      | 134 (22.4)                        | <0.001         |
| South American                                    | 33 (1.5)                       | 12 (2.0)                          | 0.35           |
| Asian                                             | 117 (5.3)                      | 54 (9.0)                          | <0.001         |
| Missing data                                      | 13 (0.6)                       | 11 (1.8)                          |                |

Data are n (%) or mean (SD). BMI = body mass index. Comparisons between groups are calculated using students *t* test (continuous variables) and  $\chi^2$  test (dichotomous variables).
