# Supplementary figures and images for: Impact of collegial midwifery assistance during second stage of labour on women’s experience: a follow-up from the Swedish Oneplus randomised controlled trial
Source: HighWire-hosted journal article supplement (doi:10.1136/bmjopen-2023-077458), 2024-07-01

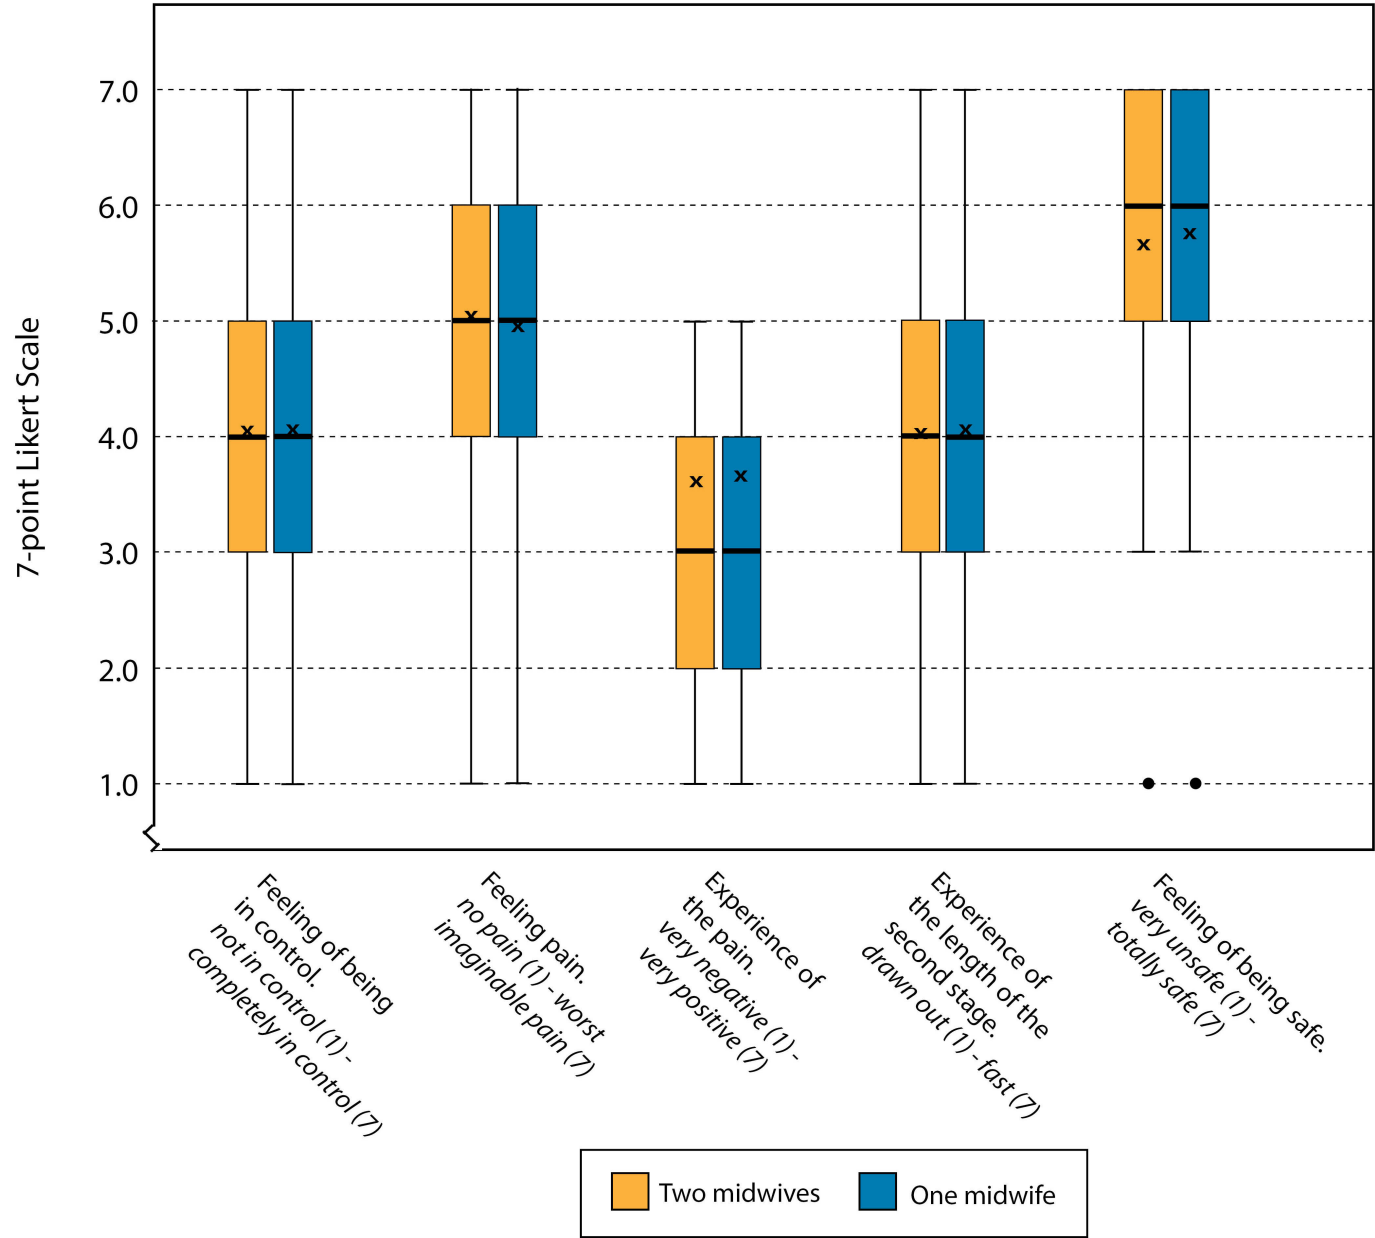

Supplement: bmjopen-2023-077458supp004_data_supplement.pdf [file bmjopen-2023-077458supp004_data_supplement.pdf]
